1  
2  
3  
4  
5  
6  
7  
8  
9  
10  
11  
12  
13  
14  
15  
16  
17  
18  
19  
20  
21  
22  
23  
24  
25  
26  
27  
28  
29  
30  
31  
32  
33  
34  
35  
36  
37  
38  
39  
40  
41

## Local axonal conduction delays underlie precise timing of a neural sequence

Robert Egger<sup>1,2</sup> ‡, Yevhen Tupikov<sup>3</sup> ‡, Kalman A. Katlowitz<sup>1,2</sup>, Sam E. Benezra<sup>1,2</sup>, Michel A. Picardo<sup>1,2</sup>, Felix Moll<sup>1,2</sup>, Jörgen Kornfeld<sup>4</sup>, Dezhe Z. Jin<sup>3</sup>, Michael A. Long<sup>1,2</sup> † \*

- 1) NYU Neuroscience Institute and Department of Otolaryngology, New York University Langone Medical Center, New York, NY 10016 USA
- 2) Center for Neural Science, New York University, New York, NY, 10003 USA
- 3) Department of Physics and Center for Neural Engineering, Pennsylvania State University, University Park, Pennsylvania 16802 USA
- 4) Max Planck Institute of Neurobiology, 82152, Martinsried, Germany

7 Main Figures

2 Supplementary Figures

\* To whom correspondence should be addressed: Michael A. Long ([mlong@med.nyu.edu](mailto:mlong@med.nyu.edu))

† Lead Contact

‡ Authors contributed equally

42 **SUMMARY**

43 Sequential activation of neurons has been observed during various behavioral and cognitive  
44 processes and is thought to play a critical role in their generation. Here, we studied a circuit in  
45 the songbird forebrain that drives the performance of adult courtship song. In this region, known  
46 as HVC, neurons are sequentially active with millisecond precision in relation to behavior. Using  
47 large-scale network models, we found that HVC sequences could only be accurately produced if  
48 sequentially active neurons were linked with long and heterogeneous axonal conduction delays.  
49 Although such latencies are often thought to be negligible in local microcircuits, we empirically  
50 determined that HVC interconnections were surprisingly slow, generating delays up to 22 ms.  
51 An analysis of anatomical reconstructions suggests that similar processes may also occur in rat  
52 neocortex, supporting the notion that axonal conduction delays can sculpt the dynamical  
53 repertoire of a range of local circuits.

54

55 **KEYWORDS:** network, conduction delay, sequence, model, motor control, local circuits

56

57 **INTRODUCTION**

58 Sequential neural activity in local brain areas is thought to play a critical role in behaviors such  
59 as motor control (Luczak et al., 2015; Mauk and Buonomano, 2004; Peters et al., 2014; Prut et  
60 al., 1998), navigation (Foster and Wilson, 2007; Pastalkova et al., 2008), and decision-making  
61 (Mello et al., 2015; Schmitt et al., 2017). A variety of mechanisms have been proposed to  
62 underlie the generation of neural sequences (Diesmann et al., 1999; Fiete et al., 2010; Goldman,  
63 2009; Hahnloser et al., 2002; Kleinfeld and Sompolinsky, 1988; Laje and Buonomano, 2013;  
64 Rajan et al., 2016), but experimental tests of these network models have been stymied by the  
65 scarcity of data sets that relate behavior, network function and circuit structure. The zebra finch  
66 is an advantageous model organism for studying the network basis of neural sequence  
67 generation. Each adult male zebra finch produces a courtship song that is nearly identical from  
68 one rendition to the next, consisting of ~3-7 discrete vocal elements known as ‘syllables’ (Figure  
69 1A). Many lines of evidence have suggested that neural activity controlling the moment-to-  
70 moment timing of song production is localized to a single brain region, called HVC (proper  
71 name) and is driven by premotor neurons in that region (Figure 1B) (Hahnloser et al., 2002;  
72 Long and Fee, 2008; Nottebohm et al., 1976; Vu et al., 1994). HVC premotor neurons produce  
73 high-frequency bursts of action potentials (~4-5 spikes/burst, ~10 ms duration) at a single  
74 moment during the song (Hahnloser et al., 2002) with millisecond precision across song  
75 renditions (Figure 1C). At the network level bursts form a sustained sequence spanning the  
76 duration of song syllables (Figure 1D and 1E).

77

78 What are the synaptic interactions enabling HVC sequence generation? Previous anatomical  
79 (Kornfeld et al., 2017) and electrophysiological (Kosche et al., 2015; Mooney and Prather, 2005)

80 studies had demonstrated direct excitatory connections between premotor neurons (Figure 1F),  
81 but the sufficiency of these connections for propagating activity from earlier to later steps in a  
82 sequence remains controversial (Cannon et al., 2015; Galvis et al., 2018; Gibb et al., 2009;  
83 Hamaguchi et al., 2016; Jin et al., 2007; Long et al., 2010; Pehlevan et al., 2018). For instance,  
84 activity may be driven through single strong connections (Lorteije et al., 2009) or through  
85 convergent inputs from several presynaptic partners (Bruno and Sakmann, 2006). Two primary  
86 lines of evidence support the latter possibility. Local excitatory synaptic strength, as estimated by  
87 active zone size in our previous ultrastructural work (Kornfeld et al., 2017), is not extraordinarily  
88 large, which does not support the idea of single presynaptic partners. Consistent with this view,  
89 unitary synaptic potentials measured with paired intracellular recordings (~2 mV) are  
90 considerably smaller than the depolarization observed during singing (~10 mV), suggesting that  
91 many presynaptic elements are involved in the generation of spiking events (Kosche et al., 2015;  
92 Long et al., 2010; Mooney and Prather, 2005). Although these presynaptic partners are likely to  
93 be other premotor neurons within HVC, their exact identity (i.e., spatial location, specific timing)  
94 remains unknown. Therefore, in order to take a step towards resolving the present conflicting  
95 theories about sequence generation in HVC, it is necessary to understand the nature of this  
96 functional convergence.

97  
98 To address this issue, we used a network model constrained by experimental measurements of  
99 HVC premotor neuron properties and population activity. We found that the spatiotemporal  
100 organization of the HVC sequence during singing is best matched by a neural network  
101 architecture in which neurons are connected by local axon collaterals with long conduction  
102 delays – matching those observed in HVC. Because of these heterogeneous conduction delays,

103 sequential activity propagates via convergent input from presynaptic neurons active at different  
104 times and, as a result, activity is ‘polychronous’ (Izhikevich, 2006) - generating continuous time-  
105 locked spiking patterns without synchrony. To assess the significance of local axonal delays in  
106 other brain areas, we estimated conduction delays along axons of layer 4 (L4) neocortical  
107 neurons (Narayanan et al., 2015), and find that the differences in axonal arbor size and  
108 conduction velocity compensate and yield delays similar to those observed in zebra finch HVC.  
109 Hence, axonal conduction delays may play a key role in shaping network activity within local  
110 brain circuits.

111

## 112 **RESULTS**

### 113 **Synfire chain models do not explain HVC population data**

114 An effective mechanism for generating postsynaptic convergence is the synchronous activation  
115 of presynaptic neurons (Figure 2A) (Bruno, 2011; Bruno and Sakmann, 2006). Feedforward  
116 networks based on synchronous neuronal activation, known as ‘synfire chains’, have long been  
117 suggested to underlie sequence generation (Abeles, 1991; Amari, 1972). This network  
118 architecture has previously been proposed to explain HVC sequences (Fee et al., 2004; Fiete et  
119 al., 2010; Jin et al., 2007; Long et al., 2010; Pehlevan et al., 2018), and has the benefit of  
120 capturing the precision of individual neurons and the stability of network sequences (Jin et al.,  
121 2007; Long et al., 2010). We generated a synfire chain network model of 20,000 active HVC  
122 premotor neurons (Long et al., 2010), where HVC premotor neurons were triggered by  
123 synchronously active presynaptic ensembles (see Methods), as reflected in the fine structure of  
124 the network output (Figure 2B, i.e., discrete groups of synchronously active neurons with ~5-6  
125 ms intervals between burst onset times). As before, this model produced a sustained network  
126 sequence covering syllable-length timescales.

127  
128 Until recently, such network models were difficult to test empirically; the number of recordings  
129 performed in HVC during song production were limited (Amador et al., 2013; Hahnloser et al.,  
130 2002). However, following recent improvements in recording technology, we can now track the  
131 activity of large cell populations (Lynch et al., 2016; Okubo et al., 2015; Picardo et al., 2016) to  
132 test model predictions against the data. Therefore, we looked for this pattern of synchronized  
133 burst onset times in HVC by examining a recently reported data set of 286 projection neurons in  
134 5 birds measured using extracellular recordings during singing (Figure 2C and 2D) (Lynch et al.,

135 2016). We compared these measurements with predictions from the synfire chain model (Figure  
136 2E and 2F) and found that the timing of activity was qualitatively different: the synfire model  
137 predicted that activity would be clustered at distinct timepoints, while the recorded data appeared  
138 to lack such temporal structure. To obtain a quantitative comparison of these differences, we  
139 computed the power spectrum of burst onset times. The synfire chain model predicted a peak in  
140 the power spectrum at ~180 Hz, corresponding to the ~5-6 ms interval between synchronous  
141 groups of neurons (Figure 2B), while the recorded data exhibited a flat power spectrum,  
142 consistent with a more uniform distribution of burst times (Figure 2G). Therefore, HVC activity  
143 does not appear to be restricted to synchronous groups, suggesting that the network connectivity  
144 is not organized as a synfire chain.

145

#### 146 **Temporal structure of polychronous network sequences is affected by conduction delays**

147 In an alternative model, presynaptic neurons are active across a range of different times, and  
148 heterogeneous network delays are sufficient to allow spikes from multiple neurons to arrive  
149 simultaneously at a postsynaptic target (Figure 3A) (Izhikevich, 2006). Previous theoretical work  
150 based on conduction delays measured between different brain areas (Swadlow, 1985, 1994)  
151 demonstrated that such a ‘polychronous’ network architecture can generate time-locked spiking  
152 patterns without synchrony (Bienenstock, 1996; Izhikevich, 2006), but it is unclear if delays in  
153 local circuits are sufficient to generate sustained sequences in this context. To estimate these  
154 delays, we needed a measure for axonal pathlength as well as conduction velocity. Axonal  
155 pathlengths to each synapse were determined using previous observations from our laboratory;  
156 the relative position and abundance of synapses were measured using electron microscopy  
157 (Kornfeld et al., 2017) and the total axonal extent for each neuron was obtained from 22

158 complete light microscopic reconstructions of local axonal collaterals (Figure 3B) (Benezra et  
159 al., 2018). Our first estimate for conduction velocity was 0.3 mm/ms, a value reported for local  
160 unmyelinated axons in mammalian neocortex (Helmstaedter et al., 2008; Hirsch and Gilbert,  
161 1991; Shu et al., 2007). Using these parameters, we developed a procedure to generate a  
162 feedforward polychronous network of HVC premotor neurons for a given distribution of axonal  
163 conduction delays (Figure S1). Because measured pathlength distances follow a log-normal  
164 distribution (Buzsaki and Mizuseki, 2014), we use this shape as our first estimate of these delays  
165 (Figure S1F). We find that the resulting network produces a reliable sequence in which neurons  
166 are active in a continuous fashion with burst onset times spread throughout (Figure 3C), thus  
167 matching our empirical observations (Figures 2E, 3D and 3E), in contrast to the discrete  
168 synchronous activity of the synfire chain model (e.g., Figure 2F and 2G).

169  
170 How important are axonal conduction delays in the function of the polychronous network? To  
171 examine this question, we artificially increased the conduction velocity of local axons by an  
172 order of magnitude within our network model. When we made the axonal delays ten times  
173 shorter (Figure 3F), we found that the resulting network sequence consisted of groups of neurons  
174 bursting near-synchronously (Figure 3F-3H), as in the synfire chain model. This result suggests  
175 that the nature of sequential activity can qualitatively shift based on the distribution of axonal  
176 conduction delays. To explore this issue more thoroughly, we created a range of models in which  
177 the means and standard deviations (SD) of axonal delays were varied parametrically over an  
178 order of magnitude (Figures 4A, 4B, and S1F), encompassing the examples discussed above  
179 (Figure 3). For each combination of mean and SD, we generated a polychronous network model  
180 and simulated network activity. We then compared our model with experimental observations by



181 determining whether the degree of network synchrony in each model – as determined by the  
182 power spectrum of burst onset times (Figure 4C and 4D) - was significantly different than  
183 empirical measurements (Figure 4E and 4F). The resulting map of the parameter space of the  
184 polychronous network revealed two regions which could be distinguished by the experimentally  
185 observed distribution of burst onset times (Figure 4G). Where the delay distribution is narrow  
186 and/or the mean delay very small, sequences are based on synchronized groups of neurons,  
187 similar to a synfire chain, and thus incompatible with HVC dynamics. Above a minimum mean  
188 and SD of the delay distribution, polychronous network sequences are continuous, matching  
189 song-related activity (e.g., Figure 2E). These activity patterns are a consequence of the  
190 requirement of convergence at the postsynaptic neuron and the range of conduction delays from  
191 presynaptic neurons. In cases where there are heterogeneous delays (e.g., Figure 3C), inputs can  
192 converge onto the same postsynaptic neuron from presynaptic neurons active at different times,  
193 enabling continuous sequences. In contrast, if the range of delays is very narrow (e.g., Figure  
194 3F), convergent inputs necessarily originate from presynaptic neurons active within this very  
195 narrow range, resulting in a sequence consisting of synchronous groups of neurons.

196

### 197 **Slow conduction velocity of local HVC axon collaterals**

198 Our polychronous network model puts a strong lower bound on the conduction delays that must  
199 exist in the HVC circuit, and our value for axonal delays, based upon published mammalian  
200 conduction velocities, is close to the boundary between continuous and discrete network  
201 sequences (Figure 4G), resulting in mild, transient synchronous activity in the beginning of the  
202 sequence (Figure 3C). We therefore decided to obtain a more precise estimate of these delays  
203 through experimental observation. A direct measure of conduction delays is complicated by the

204 fact that local unmyelinated axons are typically thin and difficult to record (Shu et al., 2006).  
205 However, HVC neurons often exhibit long-range unmyelinated axons that target the downstream  
206 song production structure (i.e., the robust nucleus of the arcopallium, RA) (Figure 1B and 5A  
207 and S2). We reasoned that we could measure the conduction velocities of these fibers and then  
208 relate long-range delays to those of the local axons within HVC. We measured the conduction  
209 velocity of action potentials in the HVC→RA projection axons by quantifying the time required  
210 for an antidromic spike initiated in RA to travel to the soma (Figure 5A, S2A and S2B)  
211 (Hahnloser et al., 2006), a path distance of  $2.8 \pm 0.2$  mm ( $n = 4$  reconstructions, Figure 5B). We  
212 then compared the morphological properties of descending axons – restricting our view to only  
213 the unmyelinated fibers (Figure S2C and S2D) – with another EM data set in which local axons  
214 of HVC premotor neurons were labeled (Figure 5C and 5D). Local axons were invariably  
215 unmyelinated and significantly thinner ( $167 \pm 73$  nm) than unmyelinated descending axons ( $446$   
216  $\pm 135$  nm) (Figure 5D, S2E and S2F). Assuming that biophysical properties of the unmyelinated  
217 local and long-range axons are similar, we used cable properties to convert the conduction  
218 velocity measurements of the descending axons to those of local HVC collaterals (Hodgkin and  
219 Huxley, 1952; Rushton, 1951). The estimated conduction velocity of HVC axon collaterals  
220 ( $0.187 \pm 0.035$  mm/ms) enabled us to infer the propagation time for spikes to travel from the  
221 soma to different parts of the axon (Figure 5E). Using this estimate, we found delays ranging  
222 from 1 to 7.5 ms (5<sup>th</sup> and 95<sup>th</sup> percentiles) and up to 22 ms. This more precise estimate of the  
223 conduction velocity is considerably slower than our previous assumption and places HVC  
224 comfortably within the parameter region of polychronous networks producing continuous  
225 sequences (Figures 5F and S3).  
226

227

228

## 229 **Polychronous network organization explains HVC spatiotemporal activity**

230 To this point, we have demonstrated that the polychronous model given our measured  
231 experimental constraints can explain the temporal structure of HVC function at a network (i.e.,  
232 continuous representation) as well as at a cellular (i.e., axonal conduction delays) level. We next  
233 asked whether this underlying circuit structure can predict other aspects of song-related HVC  
234 function. To accomplish this, we returned to our local axonal collateral reconstructions, and we  
235 placed synapses at specific locations within the axonal field that fit a variety of conduction delay  
236 distributions (Figure 6). For instance, in cases in which the conduction delays were long but  
237 exhibited a low variance, synapses were clustered on distal axons (Figure 6A). We can also look  
238 at cases in which the means of the conduction delays were low, across two variance conditions  
239 (Figures 6B and 6C). We compare these possibilities against a scenario that matches our  
240 experimental observations in which the mean and variance were both relatively high (Figure 6D).  
241 Because of the differential placement of synapses within the axonal field, each model should  
242 result in a different prediction concerning the spatiotemporal pattern of activity in HVC during  
243 singing (Graber et al., 2013; Markowitz et al., 2015; Peh et al., 2015). We performed 2-photon  
244 imaging of GCaMP6-expressing projection neurons during singing to measure the activity of 182  
245 putative premotor neurons (see Methods), combining new observations with a previously  
246 published data set (Katlowitz et al., 2018; Picardo et al., 2016) (Figure 6E). Using an established  
247 algorithm, we precisely estimated burst onset times with a temporal resolution of ~10 ms  
248 (Picardo et al., 2016) and related these values to the relative spatial position for each neuron  
249 (Figure 6F). We excluded pairs in which the difference in burst times was greater than 20 ms and

250 therefore unlikely to be driven by monosynaptic connections. In the remaining cases,  
251 sequentially active neuron pairs were found over a wide range of relative locations ( $178 \pm 102$   
252  $\mu\text{m}$ , mean  $\pm$  SD), from immediately adjacent ( $\sim 10 \mu\text{m}$ ) to much longer distances ( $\sim 500 \mu\text{m}$ , or  
253 approximately one third of the maximum extent of HVC) (Figure 6G and 6H). We then  
254 compared the spatial location of sequentially active pairs against the predictions of our  
255 previously stated models. Whereas three models predicted a high degree of spatial clustering  
256 (Figure 6A-6C), the model based on our empirically measured delay distributions was more  
257 spatially dispersed (Figure 6D), matching the functional data (Figure 6I). We conclude that a  
258 polychronous network sequence based on conduction delays observed in HVC results in a spatial  
259 organization that closely resembles observations of HVC network activity during song.

260

### 261 **Delay distributions are conserved from songbird to mammalian neocortex**

262 We have demonstrated an important impact of local axonal delays on the timing and structure of  
263 network activity within HVC of the zebra finch. Given the extraordinarily slow axonal  
264 conduction velocity in HVC compared with known values measured in a variety of different  
265 circuits (Figure 7A), it remains unclear whether such delays will play a role within those  
266 networks or whether this solution is simply a specialization within zebra finch HVC. To begin to  
267 examine this issue, we analyzed the local collaterals of 14 spiny neurons in Layer 4 of rat  
268 somatosensory cortex (Figure 7B) (Narayanan et al., 2015). When we measured the pathlength  
269 from the soma to different locations along the axon, we found that the entire size of the axonal  
270 field was considerably larger than that of HVC premotor neurons (Figure 7C). Surprisingly,  
271 when we estimated conduction delays – accounting for both the discrepancies in conduction  
272 velocity and pathlength – we find that the range of these values is identical in both cell classes

273 (L4:  $3.4 \pm 2.3$  ms, mean  $\pm$  SD; HVC:  $3.3 \pm 2.1$  ms, Figure 7D). Therefore, significant conduction  
274 delays exist within the rodent neocortex, potentially playing an important computational role  
275 within that circuit.

276 **DISCUSSION**

277 Using a range of modeling and experimental approaches, we investigated how local excitatory  
278 circuits can give rise to convergent synaptic input underlying sequential activity in the zebra  
279 finch song system. We provided three independent lines of evidence supporting a central role for  
280 slow and heterogeneous axonal conduction delays in HVC sequence generation. First, network  
281 modeling revealed that delays are required to generate the continuously active population  
282 sequences observed in HVC. Second, the delays predicted by the network model match  
283 empirically measured values for local HVC axon collaterals. Third, the spatiotemporal patterns  
284 of HVC activity observed during singing matches the predictions from our model. As a result,  
285 we propose that the core circuit for sequence generation in HVC consists of an asynchronous  
286 feedforward network based on a variety of conduction delays to generate a continuous neural  
287 sequence. Notably, previous theoretical work has demonstrated that axonal delays in synfire  
288 chain networks can enable more continuously active network sequences by ‘skipping’  
289 connections between different groups, therefore enabling so-called ‘synfire braid’ networks  
290 (Bienenstock, 1996) which function similarly to polychronous networks. Future studies will  
291 elucidate how these sequences are started (Figure S3) (Andalman et al., 2011; Danish et al.,  
292 2017; Galvis et al., 2018) as well as the role of other circuit elements, such as local circuit  
293 interneurons, in this process (Gibb et al., 2009; Jin et al., 2007; Kosche et al., 2015; Yildiz and  
294 Kiebel, 2011).

295  
296 In this study, we provide the first demonstration of a biological neural network implementing the  
297 polychronous circuit structure. We find that this network is capable of producing sustained  
298 sequential activity over behaviorally relevant timescales (Itskov et al., 2011), exceeding the

299 predictions from the original model. The continuous neural sequences arising from this model  
300 can represent any moment in time, thereby greatly increasing the resolution of the HVC  
301 premotor clock and facilitating the placement of descending motor commands at any time point  
302 during the song. While the present model assumes that synaptic connections are made within a  
303 synchronous time window, another feature of polychronization is the potential to self-organize  
304 such connectivity patterns through spike timing-dependent plasticity mechanisms (Gerstner et  
305 al., 1996; Izhikevich, 2006), and future work will determine the relevance of axonal delays for  
306 assembly of HVC circuits during song learning (Fiete et al., 2010; Jun and Jin, 2007; Okubo et  
307 al., 2015).

308  
309 We found that slow axons within a local circuit are critical for continuous sequence generation.  
310 We estimate that conduction delays are significantly larger than those afforded by other  
311 biophysical parameters, such as synaptic delays (Sabatini and Regehr, 1996) (~0.1 ms) and  
312 postsynaptic integration time (Long et al., 2010) (~5 ms during singing). Notably, the dendrites  
313 of HVC premotor neurons are highly compact (i.e., a spatial extent of less than 200 $\mu$ m) (Benezra  
314 et al., 2018) and are unlikely to contribute significantly, although to date no direct measurements  
315 of their electric signaling properties exist (Magee and Cook, 2000; Williams and Stuart, 2002).  
316 Therefore, approximately half of the total elapsed time of the HVC sequence could be attributed  
317 to local axonal conduction, a comparatively inflexible process that may underlie the behavioral  
318 stereotypy inherent in the adult zebra finch song (Lombardino and Nottebohm, 2000) by  
319 rendering the circuit less sensitive to perturbations (Hamaguchi et al., 2016; Swadlow et al.,  
320 1981). We anticipate that further studies will clarify the impact of additional time delays  
321 introduced along the pathway from HVC to syringeal motoneurons (Figure S2A) in converting

322 the HVC code to behavior and the extent to which the axonal properties themselves (e.g.,  
323 myelination status or axial diameter) can be modified through experience. Furthermore, although  
324 our model does take into account a range of axonal diameters for local collaterals, the detailed  
325 effects of precise axonal morphology – e.g., possible failures at branch points (Swadlow et al.,  
326 1980) – remain to be explored.

327  
328 The idea that axons contribute to information processing in neural circuits has long been  
329 explored for long-range connections between different brain areas (Carr and Konishi, 1988;  
330 Innocenti et al., 1994; Salami et al., 2003; Sugihara et al., 1993). For instance, in the brainstem  
331 of the barn owl, axons carrying sound information from both ears form precisely tuned and  
332 spatially organized ‘delay lines’ (Jeffress, 1948) necessary for detecting minute interaural time  
333 differences (Carr and Konishi, 1988). In contrast, the role of axonal delays within local  
334 microcircuits is often disregarded (Budd et al., 2010), possibly because of the technical  
335 challenges involved in obtaining reliable estimates of conduction velocity in local circuits. In this  
336 study, we find that the premotor song production structure HVC in the zebra finch uses ‘delay  
337 lines’ within a local circuit to generate reliable sequences of activity during song (Katlowitz et  
338 al., 2018). We do not yet know whether this specialization is unique to circuits in which a high  
339 degree of temporal precision is required or more broadly found in other networks, including  
340 those capable of more flexibility. Although we find that conduction delays along intracortical  
341 axons in a rodent neocortical area are likely to be comparable to those reported here in zebra  
342 finch HVC, the extent to which these collaterals may support persistent activity that has been  
343 observed within this region so far remains unexplored (Sachidhanandam et al., 2013). Further  
344 work in other circuits can establish whether this delay distribution represents a universal scaling



345 law (Buzsaki and Mizuseki, 2014; Liewald et al., 2014; Miller, 1996) across different species,  
346 brain regions, cell types, etc., or whether these local delays are specially tuned for the  
347 requirements of each unique case. Overall, our results suggest that in addition to defining the  
348 static architecture of neural networks (Denk et al., 2012; Plaza et al., 2014; Seung, 2012),  
349 functional properties of axons within local circuits can also control the space of neural activity  
350 patterns.

351

352 **ACKNOWLEDGEMENTS**

353 We thank Dmitriy Aronov, György Buzsáki, Dmitri Chklovskii, Yarden Cohen, Annegret  
354 Falkner, Dan Levenstein, Cengiz Pehlevan, Alex Reyes, John Rinzel, Richard Tsien, and  
355 members of the Long laboratory for comments on earlier versions of this manuscript. We thank  
356 the Fee laboratory for providing extracellular recordings of HVC projection neurons and Marcel  
357 Oberlaender for the reconstructions of L4 neurons. We thank NYU Langone's Microscopy  
358 Laboratory for assistance with electron microscopy. We also acknowledge helpful conversations  
359 with Asohan Amarasingham, Yoram Burak, Dina Obeid, and Kanaka Rajan. **Funding:** This  
360 research was supported by the DFG EG 401/1-1 (R.E.), NIH R01 NS075044 (M.A.L.), NSF EF-  
361 1822478 (D.Z.J. and M.A.L.), Simons Global Brain (M.A.L.).

362

363 **AUTHOR CONTRIBUTIONS**

364 R.E. and M.A.L. conceived the study and designed the experiments; S.E.B., M.A.L., M.A.P., F.M.  
365 and J.K. conducted the research; R.E., K.A.K., S.E.B., M.A.P., F.M., J.K., and M.A.L.  
366 performed data analyses; Y.T. and D.Z.J. developed the theoretical model; R.E., Y.T., K.A.K.,  
367 and M.A.L. created the figures; R.E. wrote the initial draft of the manuscript; R.E., D.Z.J., and  
368 M.A.L. edited and reviewed the final manuscript. R.E., M.A.L., and D.Z.J. acquired funding;  
369 M.A.L. and D.Z.J. supervised the project.

370

371 **DECLARATION OF INTERESTS**

372 The authors declare no competing interests.

373

374 **FIGURE LEGENDS**

375

376 **Figure 1. A precise neural sequence underlies zebra finch song production.** (A) Spectrogram  
377 of an example song motif consisting of four discrete syllables (top) and five different repetitions  
378 of the same song motif (bottom). (B) An illustration of the zebra finch brain showing nucleus  
379 HVC and its downstream target along the song production pathway, the robust nucleus of the  
380 arcopallium (RA). RA sends projections to brainstem motoneurons involved in producing  
381 vocalizations. (C) Spectrogram of an individual syllable (top) and spike raster plots of an HVC  
382 premotor neuron during different song renditions (middle) (Lynch et al., 2016). Bottom: relative  
383 frequency of burst onset times across trials. (D) Representative spike trains from different  
384 neurons aligned relative to on- offset of the syllable during which they are active. Red: example  
385 spike train from (C). (E) Distribution of syllable durations (58 syllables from 14 birds). (F)  
386 Example reconstruction of the local (i.e., within HVC) axon collaterals of three HVC premotor  
387 neurons. Black circle: soma location; grey spheres: modeled location of synapses onto other  
388 HVC premotor neurons along the axon.

389

390 **Figure 2. Synfire chain model of HVC premotor neurons predicts synchronized network**  
391 **sequences not observed *in vivo*.** (A) Synchronously active groups of neurons form convergent  
392 synaptic connections onto the same postsynaptic neuron, resulting in a sustained sequence at the  
393 population level. (B) Spike raster plot of sequential activity in a synfire chain model of HVC  
394 premotor neurons with numbers of synaptic connections constrained by anatomical  
395 measurements. Spikes from 10% of all active neurons are shown. Inset: Magnified view of spike  
396 raster plot highlighted (\*), revealing synchronously active groups of neurons. (C) Top:

397 Spectrogram of song consisting of four syllables. Bottom: Burst onset times of HVC projection  
398 neuron activity recorded during song. Grey: syllables. (D) Burst onset times in (C) relative to on-  
399 and offset of the syllables during which they occur. (E) Burst onset times of HVC projection  
400 neurons relative to syllable on- and offset in 23 syllables from 5 birds (Lynch et al., 2016).  
401 Syllables from (D) highlighted. (F) Burst onset times predicted by the synfire chain model by  
402 matching duration and number of observed burst times for each syllable. (G) Power spectrum of  
403 burst onset times calculated from experimental observations and the synfire chain model. Shaded  
404 area:  $\pm 3$  SD (bootstrap).

405  
406 **Figure 3. Heterogeneous axonal conduction delays enable continuous network sequences in**  
407 **polychronous network models.** (A) The activity of neurons forming convergent synaptic  
408 connections onto the same postsynaptic neuron does not have to be synchronized. Instead, if  
409 differences in spike times are compensated by suitable delays, these spikes arrive synchronously  
410 at the postsynaptic neuron, resulting in a network sequence without synchrony. (B) Pathlength to  
411 soma measured along the reconstruction of local axon collaterals of an HVC premotor neuron.  
412 Inset: Pathlength distribution measured for 22 HVC premotor neuron axons. (C) A polychronous  
413 network model of HVC premotor neurons connected by synapses with conduction delays (top  
414 inset) based on axonal pathlengths and a conduction velocity of 0.3 mm/ms generates a sustained  
415 sequence of bursting activity. Bottom inset: Burst onset times are distributed continuously  
416 throughout the sequence. Spikes from 10% of all active neurons are shown. (D) Burst onset  
417 times predicted by the polychronous network model by matching duration and number of  
418 observed burst times for each syllable. (E) Power spectrum of burst onset times calculated from  
419 the observed burst onset times and the polychronous network model. Shaded area:  $\pm 3$  SD

420 (bootstrap). (F) A polychronous network model of HVC with ten times smaller conduction  
421 delays compared to the delays in C (top inset) results in a sequence of bursting activity of HVC  
422 premotor neurons in which bursts occur in synchronous groups of neurons (bottom inset). (G, H)  
423 As in D and E for the above model in F.

424

425 **Figure 4. Polychronous network models support two distinct network sequence patterns**

426 **depending on the parameters of the underlying delay distribution.** (A) Three distributions of

427 conduction delays with different means and identical variances (SD: 1.25 ms). (B) Three

428 distributions of conduction delays with identical means (mean: 3.5 ms) and different variances.

429 (C, D) Generating a polychronous network model for each distribution (C: varying the mean; D:

430 varying the SD) allows investigating which conduction delay distributions result in continuous

431 network sequences or sequences with synchronous groups of neurons. (E, F) Mean power in the

432 frequency band from 75-200 Hz for the three models in (C) and (D) and the observed burst times

433 (black line) allows measuring the degree of synchrony in the different networks. Error bars: 5<sup>th</sup>

434 and 95<sup>th</sup> percentiles (bootstrap). (G) Two-dimensional parameter grid of polychronous networks

435 with different mean and SD of delay distributions investigated here. Each grid point is colored

436 according to the mean power of the burst onset times to determine whether the underlying

437 network produces continuous network sequences (i.e., low power, indicated in dark blue) or

438 sequences with synchronous groups of neurons (i.e., high power, indicated in green and yellow).

439 White/black: Location of the models in Figure 3B (1) and 3F (2) on the parameter grid. Black

440 line: Models to the left and below this line display sequences with synchronously active groups

441 of neurons that are not observed in HVC ( $p < 0.05$ , bootstrap).

442

443 **Figure 5. Local HVC premotor neuron axons have conduction delays supporting**  
444 **continuous sequences.** (A) Antidromic stimulation of HVC premotor neuron axons and whole-  
445 cell recording at the soma allows precise measurement of conduction times along the descending  
446 axon. Stimulus artifact is blanked for visualization. (B) Example reconstructions of the  
447 projection axon of a premotor neuron connecting HVC and RA. (C) 3D reconstruction of the  
448 soma and proximal axons of a retrogradely labeled HVC premotor neuron from an SBEM image  
449 stack. Insets: EM micrographs of labeled axons. (D) Unmyelinated axons in the HVC-RA fiber  
450 tract have larger diameters than local (unmyelinated) collaterals of HVC premotor neurons. (E)  
451 Measurement of the conduction velocity along unmyelinated long-range axons allows a precise  
452 estimate of the conduction delays along thin unmyelinated local axon collaterals of HVC  
453 premotor neurons based on 22 reconstructions of local axon collaterals. (F) The distribution of  
454 conduction delays along HVC premotor neuron axons supports a polychronous network model  
455 generating continuous sequences (see Figure 4G).

456  
457 **Figure 6. Spatial organization of a polychronous network matches HVC projection neuron**  
458 **activity during singing.** (A-D) Left: Distribution of active synapses along the local axonal  
459 collaterals of a premotor neuron for a given delay distribution (inset; A: mean / SD: 4.5 / 0.25  
460 ms; B: 0.5 / 0.25 ms; C: 0.5 / 2.75 ms; D: 3.3 / 2.1 ms). Right: Distribution of active synapses  
461 relative to the soma based on the local axonal collaterals of 22 HVC premotor neurons. (E) 2-  
462 photon calcium imaging of song-related bursting activity in HVC. Left: Example image of  
463 GCaMP6s-labeled somata. Right: Spectrogram of song motif (top), aligned normalized  
464 fluorescence traces of the neuron highlighted in left panel (center), and estimated burst onset  
465 time (bottom). (F) Left: Soma locations of 18 neurons active within the same syllable, projected

466 onto the horizontal plane. Right: Estimated burst onset times of the same neurons within the  
467 syllable. (G) Relative soma locations of putatively connected neurons in F (i.e., burst onset times  
468 within 20 ms of each other). (H) Relative soma locations of putatively connected neurons in nine  
469 birds. (I) Radial distribution of putative postsynaptic neurons in (H) (dashed line) and radial  
470 distribution of active synapses predicted by the four network models in A-D (solid lines).

471  
472 **Figure 7. Conduction delays of neocortical axonal arbors.** (A) Axonal conduction velocity  
473 measurements from the peripheral to the central nervous system. Peripheral nerves: (Hursh,  
474 1939); squid giant axon: (Hodgkin and Huxley, 1952); nucleus magnocellularis axons: (Carr and  
475 Konishi, 1990); intracortical axons: (Hirsch and Gilbert, 1991; Shu et al., 2007). (B) Example  
476 reconstructions of an HVC premotor neuron axon and a L4 spiny neuron axon from rat  
477 somatosensory cortex. Conduction delays estimated based on conduction velocity measurements  
478 in (A). D/V: dorsal/ventral. (C, D) Distributions of axonal pathlengths (C) and resulting  
479 conduction delays (D) for 22 HVC premotor neuron axons and 14 L4 spiny neuron axons  
480 (Narayanan et al., 2015).

481

482 **STAR METHODS**

483

484 **CONTACT FOR REAGENT AND RESOURCE SHARING**

485 Further information and requests for resources and reagents should be directed to and will be  
486 fulfilled by the Lead Contact, Michael Long (mlong@med.nyu.edu).

487

488 **EXPERIMENTAL MODEL AND SUBJECT DETAILS**

489 We used adult (>90 days post hatch) male zebra finches (*Taeniopygia guttata*) that were obtained  
490 from an outside breeder and maintained in a temperature- and humidity-controlled environment  
491 with a 12/12 hr light/dark schedule. All animal maintenance and experimental procedures were  
492 performed according to the guidelines established by the Institutional Animal Care and Use  
493 Committee at the New York University Langone Medical Center.

494

495 **METHOD DETAILS**

496 **Surgeries**

497 Surgical procedures for retrograde labeling of HVC premotor neurons, viral injections, chronic  
498 cranial window implantation for 2-photon imaging, and *in vivo* whole cell recordings, have  
499 previously been described in detail (Kornfeld et al., 2017; Long et al., 2010; Picardo et al.,  
500 2016). Briefly, animals were anesthetized (1-3% isoflurane in oxygen) and the scalp was cut to  
501 expose the entire skull. To label HVC premotor neurons for electron-microscopic imaging, a  
502 biotinylated dextran (BDA-dextran, MW: 3,000; Invitrogen) was injected into RA. Birds were  
503 allowed to recover for three days to allow retrograde labeling. For virus injections, a craniotomy  
504 was made over HVC and either AAV9.Syn.GCaMP6s.WPRE.SV40 (Penn Vector Core) or a 1:1



505 mix of AAV9.CamKII0.4.Cre.SV40 and either AAV9.CAG.Flex.GCaMP6f.WPRE.SV40 or  
506 AAV9.CAG.Flex.GCaMP6s.WPRE.SV40 was injected using an oil-based pressure injection  
507 system (Nanoject 3, Drummond Scientific). After injections, a cranial window was implanted  
508 over the craniotomy. For antidromic activation of HVC premotor neurons, a bipolar stimulation  
509 electrode was implanted into RA. Then, a craniotomy was made over HVC for whole-cell  
510 recordings during sleep.

511

### 512 ***In vivo* whole-cell recordings**

513 Whole-cell recordings of HVC premotor neurons during sleep were made with glass electrodes  
514 (~5-8 M $\Omega$ ) using previously described techniques (Long et al., 2010). Briefly, pipettes were  
515 advanced with positive pressure while monitoring resistance. Proximity to neurons was indicated  
516 by a resistance increase, and pressure was released to allow formation of a gigaseal. The  
517 membrane was ruptured by applying negative pressure. After establishing whole-cell  
518 configuration, series resistance was compensated and the membrane potential recorded in  
519 current-clamp mode. Recordings with series resistance values greater than 30 M $\Omega$  and resting  
520 membrane potentials more depolarized than -60 mV were discarded. HVC premotor neurons  
521 were identified by evoking antidromic action potentials upon stimulation of RA (10-100  $\mu$ A  
522 amplitude, bipolar stimulation of 0.2ms duration).

523

### 524 **2-photon calcium imaging**

525 The procedures for 2-photon calcium imaging of HVC neurons during singing have been  
526 described previously (Katlowitz et al., 2018; Picardo et al., 2016). Briefly, birds were first  
527 trained to perform directed singing in the head-fixed configuration upon presentation of a female

528 bird using operant conditioning with a water reward (Picardo et al., 2016). Once the behavior  
529 was learned, virus injections and cranial window implantation were performed. 2-photon calcium  
530 imaging was carried out using a resonant scanning system (Thorlabs) at a frame rate of 28.8 Hz  
531 and a 16x water-immersion objective (NA 0.8, WD 3 mm; Nikon). We acquired singing  
532 behavior using an omnidirectional microphone (Audio-Technica) digitized at 40 kHz (Digidata  
533 1550, Molecular Devices). Motif-related image data were temporally aligned offline by linearly  
534 warping to manually annotated reference points within the song. Fluorescence traces were  
535 extracted from manually drawn ROIs (ImageJ) on temporally aligned and motion-corrected (Miri  
536 et al., 2011) image stacks. Frame times were defined for each neuron as the mean time point that  
537 the laser reached the ROI as a function of vertical scanning location. Last, burst onset times were  
538 deconvolved from the raw traces using a Markov Chain Monte Carlo inference approach with an  
539 average uncertainty of ~10 ms (Picardo et al., 2016; Pnevmatikakis et al., 2016). These analyses  
540 were performed using custom Matlab scripts (Mathworks).

541

### 542 **Extracellular recordings during singing**

543 We reanalyzed a previously reported data set of burst times from HVC neurons during singing  
544 (Lynch et al., 2016; Okubo et al., 2015). The data set contained extracellular recordings obtained  
545 in two adult birds (i.e.,  $\geq 103$  d.p.h.) and three young adult birds (i.e.,  $\geq 59$  d.p.h.) with a stable  
546 motif. Single units were identified as HVC projection neurons (i.e., projecting to nucleus RA or  
547 along the anterior forebrain pathway to Area X) by antidromic stimulation or as putative HVC  
548 projection neurons based on low spontaneous firing rate (i.e.,  $< 1$  Hz) and sparse bursting activity  
549 during singing. Individual song motifs and the accompanying neural activity were time-warped  
550 to syllable on- and offsets. Then, the firing rate was computed in 1 ms bins and smoothed with a

551 9 ms wide sliding window. A ‘burst window’ was defined as a period where the smoothed firing  
552 rate exceeded a threshold of 10 Hz. To define the burst onset more precisely, each spike falling  
553 into the ‘burst window’ was replaced with a 5 ms wide ‘spike interval’ starting at the spike time.  
554 The burst onset time is defined as the earliest time point in a ‘burst window’ where at least three  
555 ‘spike intervals’ from different song renditions overlap.

556

### 557 **Histological procedures**

558 For serial block-face electron-microscopic (SBEM) imaging, perfusion and histology was  
559 performed as described in detail previously (Kornfeld et al., 2017). For transmission electron-  
560 microscopic imaging, the protocol used for SBEM imaging was slightly modified as follows.  
561 After the bird was transcardially perfused, the brain was removed from the skull and post-fixed  
562 overnight (Kornfeld et al., 2017). The brain was then cut into 100  $\mu\text{m}$  thick slices using a  
563 vibratome (Leica VT1000S). Residual peroxidase activity was suppressed by soaking the sample  
564 in 3%  $\text{H}_2\text{O}_2$  for 20 min before labeling the sample with an avidin-peroxidase complex and DAB.  
565 A slice containing clearly visible stained fibers from HVC to RA was carefully unmounted by  
566 immersing the microscope slide into PB. After washing with PB, the samples were post fixed in  
567 1%  $\text{OsO}_4$  for 2 hours, block stained with 1% uranyl acetate for 1 hour, dehydrated in ethanol and  
568 embedded in EMBED 812 (Electron Microscopy Sciences, Hatfield, PA). Semi-thin sections were  
569 cut at 1  $\mu\text{m}$  and stained with 1% toluidine blue to find the previously identified area of interest  
570 containing fibers from HVC to RA. In each sample, 20 serial ultrathin sections with 100 nm  
571 thickness were cut, mounted on slot copper grids, and stained with uranyl acetate and lead  
572 citrate.

573

574 **Transmission-electron microscope imaging**

575 Stained grids were examined under a Philips CM-12 electron microscope (FEI; Eindhoven, The  
576 Netherlands) and photographed with a Gatan (4k x 2.7k) digital camera (Gatan, Inc., Pleasanton,  
577 CA). Samples were imaged at a series of increasing magnifications (i.e., ranging from 3,400x to  
578 66,000x magnification) to allow identification of fiber tracts and ultimately individual fibers  
579 within these tracts. Diameter measurements of unmyelinated projection axons were made on  
580 images with a magnification of at least 40,000x.

581

582 **Axon diameter measurements**

583 All light micrographs used for illustration of local and descending axons were captured using a  
584 Zeiss AxioObserver Inverted. We acquired images of descending HVC premotor neuron axons  
585 from ultrathin sections using a transmission electron microscope (see above). Unmyelinated  
586 descending axons were identified based on dark DAB labeling in EM micrographs. Myelinated  
587 axons were identified morphologically by presence of multiple, closely wrapped membrane  
588 layers (i.e., myelin sheaths). Diameters were measured along the shortest axis of the  
589 circumference of each axon (i.e., if the axon was cylindrical, this corresponds to the diameter of  
590 the cylinder irrespective of sectioning angle) (Figure S2F). Diameters of local HVC premotor  
591 neuron collaterals were measured using a previously reported data set acquired using serial  
592 block-face EM (Kornfeld et al., 2017) with a voxel size of 11 x 11 x 29 nm<sup>3</sup> containing HVC  
593 premotor neurons labeled by injection of a tracer (BDA-dextran) into RA. Diameters of  
594 randomly selected locations along labeled local axon collaterals were measured by determining  
595 the image plane that was closest to the orthogonal plane defined by the axon and measuring the  
596 axon diameter in that plane.

597

## 598 **Estimating synapse locations along axons**

599 We estimated the possible locations of synapses between HVC premotor neurons along local  
600 axons by combining results from previously reported anatomical data sets (Benezra et al., 2018;  
601 Kornfeld et al., 2017). We used a database of 22 reconstructions of local axon collaterals of *in*  
602 *vivo* labeled HVC premotor neurons (Benezra et al., 2018) to determine possible synapse  
603 locations irrespective of the postsynaptic target along the local axons of each neuron by sampling  
604 points along the reconstructed axons at the average distance between synapses, which has  
605 previously been determined using EM measurements along HVC premotor neuron axons  
606 (Kornfeld et al., 2017). We then estimated which of these possible synapse locations could target  
607 other HVC premotor neurons. To do so, we fitted previous EM measurements of the relative  
608 frequency of HVC premotor neurons as the postsynaptic target as a function of distance to the  
609 presynaptic soma with a sigmoidal function. For each estimated synapse location along the  
610 reconstructed axons, we then computed the synapse-soma distance and placed a synapse at this  
611 location with a probability equal to the corresponding relative frequency. Finally, we computed  
612 the pathlength distance between each of these possible premotor synaptic locations and the soma  
613 (i.e., the shortest path along the axon connecting these two points).

614

615 Synapse locations along HVC premotor neuron axons for a given delay mean and SD were  
616 estimated as follows. Points along the reconstructed axon were grouped according to their  
617 pathlength distance to the soma into 50  $\mu\text{m}$  bins. If successive points in the reconstruction had an  
618 interval of more than 1  $\mu\text{m}$ , additional points were inserted at 0.5  $\mu\text{m}$  intervals using linear  
619 interpolation (i.e., leaving the pathlength unchanged). Next, the log-normal delay distribution

620 with given mean and SD was converted to a pathlength distribution by multiplication with the  
621 axonal conduction velocity of local HVC premotor neuron axons (i.e., 0.187 mm/ms). For each  
622 neuron, we generated  $N_{\text{Syn}} * L_{\text{Neuron}} / L_{\text{Avg}}$  samples from this log-normal distribution. Here,  $N_{\text{Syn}}$   
623 = 170 is the average number of synapses made by each HVC premotor neuron onto other  
624 premotor neurons,  $L_{\text{Neuron}}$  is the total axonal pathlength of this specific premotor neuron and  $L_{\text{Avg}}$   
625 is the average axonal pathlength across all 22 premotor neurons (Benezra et al., 2018). Samples  
626 beyond the maximum pathlength distance to the soma were repeated. A histogram of these  
627 samples with a bin width of 50  $\mu\text{m}$  was computed. For each 50  $\mu\text{m}$  bin, points along the  
628 reconstruction in the corresponding pathlength bin were randomly sampled until the number of  
629 elements in this bin of the histogram was reached and a synapse was placed at the location of  
630 each sampled points along the reconstruction.

631

### 632 **Estimating axonal conduction delays**

633 The first estimate of conduction delays along local HVC premotor neuron axons was obtained by  
634 measuring the pathlength from the soma to points along the axon spaced at the mean inter-  
635 bouton interval of HVC premotor neuron axons (10.5  $\mu\text{m}$ ) (Kornfeld et al., 2017). Combining  
636 these measurements from 22 reconstructions of premotor neuron axons reported previously  
637 (Benezra et al., 2018) resulted in an average distribution of pathlengths. We then converted  
638 these pathlengths into a conduction delay distribution by multiplying each pathlength distance  
639 with a value of 0.3 mm/ms for the conduction velocity of unmyelinated neocortical axons. A log-  
640 normal distribution described the shape of the conduction delay distribution well (least-squares  
641 fit  $R^2 = 0.9988$ ). We therefore used mean and standard deviation of a log-normal distribution to  
642 parameterize the conduction delays for the polychronous network models.

643  
644 Conduction delays along L4 spiny neuron axons were estimated in the same way. We measured  
645 the distribution of pathlength distances of 14 complete reconstructions of the intracortical axonal  
646 arbor of L4 neurons labeled *in vivo* (Narayanan et al., 2015) and multiplied pathlengths by a  
647 conduction velocity of 0.3 mm/ms to obtain the conduction delay distribution.

648  
649 The conduction time along long-range axons from HVC to RA was measured from whole-cell  
650 membrane potential recordings of HVC premotor neurons as the difference between the onset  
651 time of antidromic stimulation in RA and action potential onset. The action potential onset was  
652 defined by calculating the second derivative of the membrane potential between 0-20 ms after  
653 stimulation and determining the first upward threshold crossing, where the threshold was set as  
654 the minimum of either 3 standard deviations of the second derivative or 400 mV/ms<sup>2</sup>. To  
655 determine the threshold between putative groups of conduction delays, we used k-means  
656 clustering with two groups. The pathlength of the long-range axon of HVC premotor neurons  
657 was measured from the soma to the first bifurcation of the axon as it entered RA. The average  
658 conduction velocity of unmyelinated descending axons was calculated by dividing the average  
659 descending pathlength by the average conduction time of the second mode of the conduction  
660 time distribution measured as described above. We then used a simple biophysical model relating  
661 the diameter of unmyelinated axons to conduction velocity (Hodgkin and Huxley, 1952;  
662 Rushton, 1951):

$$u = c\sqrt{d}$$

663 Here,  $u$  is the conduction velocity,  $d$  the axon diameter, and  $c$  a constant. We determined  $c$  using  
664 the average conduction velocity and average diameter of putative unmyelinated descending

665 axons and assumed that this constant is the same for unmyelinated local axons of HVC premotor  
666 neurons (i.e., that the basic biophysical properties underlying action potential propagation are the  
667 same). We then calculated a distribution of conduction velocities given the observed distribution  
668 of diameters of local axonal projections. To estimate the distribution of conduction times to  
669 synapses onto other HVC premotor neurons, we used a Monte Carlo simulation approach. We  
670 stepped through all possible synapse locations along the set of reconstructed axon morphologies  
671 of HVC premotor neurons. For each possible location, we calculated the distribution of  
672 conduction times to that location given the pathlength to the soma and the estimated distribution  
673 of local conduction velocities. We then randomly selected one of the possible conduction times  
674 and randomly assigned it as a synapse onto other HVC premotor neurons based on EM  
675 measurements of premotor synapse density for each location relative to the soma (Kornfeld et al.,  
676 2017). We ran 100 Monte Carlo simulations to obtain a robust estimate of the resulting  
677 conduction time distribution to other HVC premotor neurons.

678

### 679 **Frequency analysis of burst onset times**

680 For each syllable in the electrophysiology data set, we determined the syllable length and  
681 number of burst onset times occurring during the syllable. In our modeling effort (see Figure 2F,  
682 3D and 3G), we simulated possible burst onset time distributions by sampling random numbers  
683 distributed in time according to the burst density of the model, while preserving the distribution  
684 of syllable lengths from the experimental data sets and the number of burst onset times observed  
685 during each syllable. For each syllable, we then defined the power spectral density  $P_s$  of the burst  
686 times as the absolute magnitude squared of the discrete Fourier transform evaluated at  
687 frequencies  $f$  between 1 and 300 Hz, in increments of 4 Hz:



$$P_s(f) = \left| \sum_{j=1}^n \exp(2\pi i f t_j) \right|^2$$

688 Here,  $n$  is the number of bursts in the syllable, and  $t_j$  the burst onset time of the  $j^{\text{th}}$  burst. We then  
689 calculated the mean power spectrum across all syllables. In order to obtain a reliable estimate of  
690 the predicted power spectrum of each model and its uncertainty, we repeated this procedure  
691 10,000 times, and computed the mean and standard deviation at all evaluated frequencies. For  
692 comparison with experimental data, we set the confidence interval as  $\pm 3$  standard deviations.

693

#### 694 **Neuron and synapse models**

695 HVC premotor neurons were modeled as a two-compartment model with a dendritic and somatic  
696 compartment (Long et al., 2010). Current injection at the soma triggers sodium channel-  
697 dependent action potentials, while current injection (and synaptic input) to the dendrite  
698 compartment triggers an all-or-none calcium spike, which in turn triggers a high-frequency burst  
699 of four action potentials at the soma. Ion channels were modeled using the Hodgkin-Huxley  
700 formalism. All model parameters are identical to our previous work (Long et al., 2010), except  
701 for the following differences:  $R_c = 130 \text{ M}\Omega$ ,  $G_{s,L} = 0.05 \text{ mS/cm}^2$ ,  $\tau_c = 15 \text{ ms}$ . Conductance-based  
702 excitatory synapses were modeled according to ‘kick-and-decay’ dynamics. Upon synaptic  
703 release, the synaptic conductance was increased by  $G_{\text{syn}}$ , followed by an exponential decay with  
704 time constant  $\tau_{\text{syn}} = 5 \text{ ms}$ . The weight  $G_{\text{syn}}$  of individual synapses was drawn from a uniform  
705 distribution  $[0, G_{\text{max}}]$ , with  $G_{\text{max}}$  set to  $0.05 \text{ mS/cm}^2$ , a value that leads to a unitary EPSP of  $\sim 4$   
706 mV at the soma (i.e., the average EPSP amplitude is 2 mV (Mooney and Prather, 2005)).

707

#### 708 **Synfire chain network assembly**

709 The synfire chain network model of HVC premotor neurons was constructed by sequentially  
710 connecting 117 nodes with 170 neurons in each node, corresponding to 19,890 neurons in the  
711 entire network. Neurons in each node of the synfire chain were connected in a feed-forward all-  
712 to-all manner to the neurons in the subsequent node.

713

#### 714 **Feedforward polychronous network assembly**

715 The feedforward polychronous network (Izhikevich, 2006) was assembled in an iterative  
716 process. The algorithm was designed to enforce synchrony of the synaptic inputs to the  
717 postsynaptic neurons. The timing of presynaptic bursts must be such that the spikes arrive at the  
718 postsynaptic neuron within a narrow time window (discussed below), taking into account the  
719 different axonal conduction delays. The number of connections that each neuron can receive was  
720 limited to 170 (Kornfeld et al., 2017). The axonal delays of these connections were based on  
721 observed delay distributions.

722

723 Each iteration consisted of three steps (Figure S1A): *(i)* simulation of network dynamics to  
724 determine the burst onset times of all neurons in the network at the current iteration; *(ii)* adding  
725 feedforward connections constrained by a given conduction delay distribution between ‘source  
726 neurons’ (i.e., presynaptic neurons) and ‘target neurons’ (i.e., potential postsynaptic targets  
727 which do not form outgoing connections in the current iteration); *(iii)* adding additional neurons  
728 into the network. As a result, the feedforward network grows in size and the corresponding  
729 population sequence in duration during this iterative process (Figure S1B). In *step (i)* of each  
730 iteration, network dynamics were simulated by activating a set of 200 predefined ‘starter  
731 neurons’ and recording burst onset times of all active neurons in the network. In *step (ii)*, new

732 feedforward synaptic connections between ‘source’ and ‘target neurons’ were added. First,  $N_{\text{new}}$   
733 neurons were moved from the set of ‘target neurons’ in the previous iteration to the set of ‘source  
734 neurons’. Specifically, these were the ‘target neurons’ whose simulated burst onset times were  
735 within a 2 ms window from the earliest simulated burst onset time of all ‘target neurons’ (Figure  
736 S1C). We then generated a ‘synaptic pool’ (i.e., a set of conduction delays  $\tau_{\text{ax}}$ ) of size  $N_{\text{out}} * N_{\text{new}}$   
737 ( $N_{\text{out}} = 170$ )(Kornfeld et al., 2017) by sampling from the given distribution of conduction  
738 delays. We iterated over all ‘target neurons’ ordered according to the number of synaptic inputs,  
739 starting with the smallest number. For each ‘target neuron’, we randomly selected a ‘source  
740 neuron’ that fulfilled the polychronization requirement  $|t_{\text{target}} - t_{\text{int}} - \tau_{\text{ax}} - t_{\text{source}}| \leq \tau_{\text{sync}}$  using a  
741 suitable conduction delay  $\tau_{\text{ax}}$  from the ‘synaptic pool’ (Figure S1D; i.e., requiring that all  
742 synaptic inputs to the ‘target neuron’ arrive within a synchronous time window  $2 * \tau_{\text{sync}}$  (here:  
743 time window of 1 ms).  $t_{\text{source}}$  is the burst onset time of the ‘source neuron’,  $t_{\text{int}}$  is the average  
744 integration time constant of HVC premotor neurons from onset of the synaptic inputs to burst  
745 threshold (set to 5 ms) (Long et al., 2010), and  $t_{\text{target}}$  is the burst onset time of the ‘target neuron’.  
746 If there were multiple  $\tau_{\text{ax}}$  allowing a connection between the ‘source neuron’ and the ‘target  
747 neuron’, the one minimizing the quantity  $|t_{\text{target}} - t_{\text{int}} - \tau_{\text{ax}} - t_{\text{source}}|$  was selected (i.e., only one  
748 synapse was placed between a pair of ‘source’ and ‘target neurons’). After placement, this  
749 synaptic connection was removed from the ‘synaptic pool’. If the number of synaptic inputs to  
750 the ‘target neuron’ reached 170 or no connection from the ‘source neurons’ could be made given  
751 the conduction delays in the ‘synaptic pool’, it was not considered as a ‘target neuron’ anymore.  
752 In *step (iii)*, neurons were added to the network in order to increase the network from the set of  
753 starter neurons to its final size. This step was taken in case there were no more ‘target neurons’  
754 before the ‘synaptic pool’ was exhausted. In this case, the set of ‘target neurons’ was restored to

755 its state at the beginning of the iteration. A new ‘target neuron’ (i.e., without any existing  
756 incoming or outgoing synaptic connections) was added to the network by placing a synaptic  
757 connection with a randomly selected conduction delay  $\tau_{ax}$  from the ‘synaptic pool’ originating  
758 from one of the  $N_{new}$  ‘source neurons’ added to the network in this iteration. The putative burst  
759 onset time of the new ‘target neuron’ was defined as:  $t_{new} = t_{source} + \tau_{ax} + \tau_{int}$  (Figure S1E). All  
760 other synaptic connections placed in this iteration were removed from the network; the  
761 associated conduction delays were moved back into the ‘synaptic pool’; and *steps (ii) and (iii)*  
762 were repeated until the ‘synaptic pool’ was empty. Then, the next iteration was started, and this  
763 process repeated until all 20,000 HVC-RA neurons were incorporated into the network. To  
764 investigate the effect of conduction delays on sequence generation, we used different conduction  
765 delay distributions during network assembly. The delay distribution in the completely assembled  
766 network matched the distributions based on observed delays (Figure S1F).

767

## 768 **Simulations**

769 During simulations, HVC premotor neurons received additional independent white noise input  
770 currents to their somatic and dendritic compartments with zero mean and amplitudes  $A_{soma} =$   
771  $0.1nA$  and  $A_{dendrite} = 0.2nA$ , leading to fluctuations of the somatic membrane potential with a  
772 standard deviation of 4.2 mV (Long et al., 2010). To account for the white noise currents, the  
773 HVC premotor neuron models were treated as a system of stochastic differential equations and  
774 solved using the AN3D1 weak 3<sup>rd</sup> order method (Debrabant, 2010). The simulation time step was  
775 set to 0.02 ms.

776

777 Each simulation was started by activating the set of 200 ‘starter neurons’ using an excitatory  
778 conductance kick with amplitude 300 nS exponential decay with time constant 5 ms (i.e.,  
779 simulating synchronous synaptic input). This input was delivered to the ‘starter neurons’ either  
780 synchronously, uniformly distributed over a 7 ms window, or randomly within a 10 ms window.  
781 In order to minimize transient effects of this activation procedure, the first 50 ms of simulated  
782 activity were discarded. Network activity patterns after this transient period were qualitatively  
783 similar between the different activation procedures. To generate burst densities, we ran 50  
784 simulations, recorded the burst onset time of each neuron (i.e., the time where the membrane  
785 potential at the soma crosses 0 mV for the first time during a burst) and calculated the average  
786 number of bursts in 0.75 ms bins.

787

## 788 **QUANTIFICATION AND STATISTICAL ANALYSIS**

789 All statistical details of experiments can be found in figure legends and the Results section,  
790 including the statistical tests used, exact value of n, what n represents (e.g., number of animals,  
791 number of cells, etc.), definition of center, and dispersion and precision measures (e.g., mean,  
792 median, SD, SEM, confidence intervals). Significance was defined at a level of 0.05. Normal  
793 distribution of data was not assumed. No data were excluded from analysis. Statistical  
794 calculations were performed using MATLAB R2016a.

795

## 796 **DATA AND SOFTWARE AVAILABILITY**

797 Software and documentation required for setting up and running simulations of the synfire chain  
798 and polychronous network models can be downloaded from:  
799 <https://psu.box.com/s/55gh5tjgpcvxcikel4wjfkzxdwyc0s7x4>

800

801 **SUPPLEMENTAL FIGURE LEGENDS**

802

803 **Figure S1. Polychronous network assembly. Related to Figure 3 and Figure 4. (A)**

804 Algorithm for polychronous feedforward network assembly. (B) During each iteration, neurons

805 are added to the network such that they are active at the end of the current network sequence. (C)

806 In each iteration, the sets of source and target neurons are updated according to simulated burst

807 onset times in the current state of the network. (D) Illustration of synapse placement based on

808 polychronous principle. (E) Illustration of placement of synapses onto neurons newly added into

809 the network. (F). Top: Observed delay distribution and log-normal fit. Center, bottom: Mean and

810 SD of the delay distributions in assembled networks match the parameters of the input log-

811 normal distributions. Dashed: identity line.

812

813 **Figure S2. Estimation of conduction velocity along unmyelinated axons. Related to Figure**

814 **5. (A)** Conduction delay measurements along the HVC→RA projection axon of 40 projection

815 neurons. Group membership was defined based on k-mean clustering with two groups. (B)

816 Identification of ‘dashed’ (left; group *i*) or ‘continuous’ (right; group *ii*) labeling of projection

817 axons from HVC to RA. (C) Identification of myelinated (orange) and unmyelinated axons in the

818 HVC→RA fiber tract. (D) DAB stain enters the axons at nodes of Ranvier (blue), but not at

819 myelinated parts of the axon (orange), leaving myelinated segments unlabeled. (E) Comparison

820 of diameters of descending projection axon and local collaterals of four HVC premotor neurons.

821 (F) Diameters of labeled axons in EM images were measured along the shortest axis, minimizing

822 systematic errors due to the unknown orientation of the fiber with respect to the imaging plane.

823

824 **Figure S3. Polychronous network sequences with HVC conduction delays and different**  
825 **initial conditions. Related to Figure 3 and Figure 5.** (A) Polychronous network sequence with  
826 HVC conduction delays and synchronously active starter neurons. (B) Zoom into the first 50 ms  
827 of the sequence in (A). (C) As in (A), starter neuron activity uniformly distributed within a 7 ms  
828 window. (D) Zoom into the first 50 ms of the sequence in (C). (E) As in (A), starter neurons are  
829 active at random time points within a 10 ms window. (F) Zoom into the first 50 ms of the  
830 sequence in (E). (G) Polychronous network sequence shown in Figure 3C (i.e., using HVC  
831 pathlength measurements and rodent conduction velocity); starter neurons are active  
832 synchronously. (H) Zoom into the first 50 ms of the sequence in (G).  
833



## 834 REFERENCES

- 835 Abeles, M. (1991). *Corticonics: Neural Circuits of the Cerebral Cortex* (Cambridge University Press).
- 836 Amador, A., Perl, Y.S., Mindlin, G.B., and Margoliash, D. (2013). Elemental gesture dynamics are encoded  
837 by song premotor cortical neurons. *Nature* *495*, 59-64.
- 838 Amari, S. (1972). Learning patterns and pattern sequences by self-organizing nets of threshold elements.  
839 *IEEE Trans Comp c-21*, 1197-1206.
- 840 Andalman, A.S., Foerster, J.N., and Fee, M.S. (2011). Control of vocal and respiratory patterns in  
841 birdsong: dissection of forebrain and brainstem mechanisms using temperature. *PLoS One* *6*, e25461.
- 842 Benezra, S.E., Narayanan, R.T., Egger, R., Oberlaender, M., and Long, M.A. (2018). Morphological  
843 characterization of HVC projection neurons in the zebra finch (*Taeniopygia guttata*). *J Comp Neurol* *526*,  
844 1673-1689.
- 845 Bienenstock, E. (1996). On the dimensionality of cortical graphs. *J Physiol Paris* *90*, 251-256.
- 846 Bruno, R.M. (2011). Synchrony in sensation. *Curr Opin Neurobiol* *21*, 701-708.
- 847 Bruno, R.M., and Sakmann, B. (2006). Cortex is driven by weak but synchronously active thalamocortical  
848 synapses. *Science* *312*, 1622-1627.
- 849 Budd, J.M., Kovacs, K., Ferecsko, A.S., Buzas, P., Eysel, U.T., and Kisvarday, Z.F. (2010). Neocortical axon  
850 arbors trade-off material and conduction delay conservation. *PLoS Comput Biol* *6*, e1000711.
- 851 Buzsaki, G., and Mizuseki, K. (2014). The log-dynamic brain: how skewed distributions affect network  
852 operations. *Nat Rev Neurosci* *15*, 264-278.
- 853 Cannon, J., Kopell, N., Gardner, T., and Markowitz, J. (2015). Neural Sequence Generation Using  
854 Spatiotemporal Patterns of Inhibition. *PLoS Comput Biol* *11*, e1004581.
- 855 Carr, C.E., and Konishi, M. (1988). Axonal delay lines for time measurement in the owl's brainstem. *Proc*  
856 *Natl Acad Sci U S A* *85*, 8311-8315.
- 857 Carr, C.E., and Konishi, M. (1990). A circuit for detection of interaural time differences in the brain stem  
858 of the barn owl. *J Neurosci* *10*, 3227-3246.
- 859 Danish, H.H., Aronov, D., and Fee, M.S. (2017). Rhythmic syllable-related activity in a songbird motor  
860 thalamic nucleus necessary for learned vocalizations. *PLoS One* *12*, e0169568.
- 861 Debrabant, K. (2010). Runge-Kutta methods for third order weak approximation of SDEs with  
862 multidimensional additive noise. *Bit* *50*, 541-558.
- 863 Denk, W., Briggman, K.L., and Helmstaedter, M. (2012). Structural neurobiology: missing link to a  
864 mechanistic understanding of neural computation. *Nat Rev Neurosci* *13*, 351-358.
- 865 Diesmann, M., Gewaltig, M.O., and Aertsen, A. (1999). Stable propagation of synchronous spiking in  
866 cortical neural networks. *Nature* *402*, 529-533.
- 867 Fee, M.S., Kozhevnikov, A.A., and Hahnloser, R.H. (2004). Neural mechanisms of vocal sequence  
868 generation in the songbird. *Ann N Y Acad Sci* *1016*, 153-170.
- 869 Fiete, I.R., Senn, W., Wang, C.Z., and Hahnloser, R.H. (2010). Spike-time-dependent plasticity and  
870 heterosynaptic competition organize networks to produce long scale-free sequences of neural activity.  
871 *Neuron* *65*, 563-576.
- 872 Foster, D.J., and Wilson, M.A. (2007). Hippocampal theta sequences. *Hippocampus* *17*, 1093-1099.
- 873 Galvis, D., Wu, W., Hyson, R.L., Johnson, F., and Bertram, R. (2018). Interhemispheric dominance  
874 switching in a neural network model for birdsong. *J Neurophysiol* *120*, 1186-1197.
- 875 Gerstner, W., Kempter, R., van Hemmen, J.L., and Wagner, H. (1996). A neuronal learning rule for sub-  
876 millisecond temporal coding. *Nature* *383*, 76-81.
- 877 Gibb, L., Gentner, T.Q., and Abarbanel, H.D. (2009). Inhibition and recurrent excitation in a  
878 computational model of sparse bursting in song nucleus HVC. *J Neurophysiol* *102*, 1748-1762.
- 879 Goldman, M.S. (2009). Memory without feedback in a neural network. *Neuron* *61*, 621-634.

880 Graber, M.H., Helmchen, F., and Hahnloser, R.H. (2013). Activity in a premotor cortical nucleus of zebra  
881 finches is locally organized and exhibits auditory selectivity in neurons but not in glia. *PLoS One* 8,  
882 e81177.

883 Hahnloser, R.H., Kozhevnikov, A.A., and Fee, M.S. (2002). An ultra-sparse code underlies the generation  
884 of neural sequences in a songbird. *Nature* 419, 65-70.

885 Hahnloser, R.H., Kozhevnikov, A.A., and Fee, M.S. (2006). Sleep-related neural activity in a premotor and  
886 a basal-ganglia pathway of the songbird. *J Neurophysiol* 96, 794-812.

887 Hamaguchi, K., Tanaka, M., and Mooney, R. (2016). A Distributed Recurrent Network Contributes to  
888 Temporally Precise Vocalizations. *Neuron* 91, 680-693.

889 Helmstaedter, M., Staiger, J.F., Sakmann, B., and Feldmeyer, D. (2008). Efficient recruitment of layer 2/3  
890 interneurons by layer 4 input in single columns of rat somatosensory cortex. *J Neurosci* 28, 8273-8284.

891 Hirsch, J.A., and Gilbert, C.D. (1991). Synaptic physiology of horizontal connections in the cat's visual  
892 cortex. *J Neurosci* 11, 1800-1809.

893 Hodgkin, A.L., and Huxley, A.F. (1952). A quantitative description of membrane current and its  
894 application to conduction and excitation in nerve. *J Physiol* 117, 500-544.

895 Hursh, J.B. (1939). Conduction velocity and diameter of nerve fibers. *American Journal of Physiology*  
896 127, 131-139.

897 Innocenti, G.M., Lehmann, P., and Houzel, J.C. (1994). Computational structure of visual callosal axons.  
898 *Eur J Neurosci* 6, 918-935.

899 Itskov, V., Curto, C., Pastalkova, E., and Buzsaki, G. (2011). Cell assembly sequences arising from spike  
900 threshold adaptation keep track of time in the hippocampus. *J Neurosci* 31, 2828-2834.

901 Izhikevich, E.M. (2006). Polychronization: computation with spikes. *Neural Comput* 18, 245-282.

902 Jeffress, L.A. (1948). A place theory of sound localization. *J Comp Physiol Psychol* 41, 35-39.

903 Jin, D.Z., Ramazanoglu, F.M., and Seung, H.S. (2007). Intrinsic bursting enhances the robustness of a  
904 neural network model of sequence generation by avian brain area HVC. *J Comput Neurosci* 23, 283-299.

905 Jun, J.K., and Jin, D.Z. (2007). Development of neural circuitry for precise temporal sequences through  
906 spontaneous activity, axon remodeling, and synaptic plasticity. *PLoS One* 2, e723.

907 Katlowitz, K.A., Picardo, M.A., and Long, M.A. (2018). Stable Sequential Activity Underlying the  
908 Maintenance of a Precisely Executed Skilled Behavior. *Neuron* 98, 1133-1140 e1133.

909 Kleinfeld, D., and Sompolinsky, H. (1988). Associative neural network model for the generation of  
910 temporal patterns. Theory and application to central pattern generators. *Biophys J* 54, 1039-1051.

911 Kornfeld, J., Benezra, S.E., Narayanan, R.T., Svava, F., Egger, R., Oberlaender, M., Denk, W., and Long,  
912 M.A. (2017). EM connectomics reveals axonal target variation in a sequence-generating network. *Elife* 6.

913 Kosche, G., Vallentin, D., and Long, M.A. (2015). Interplay of inhibition and excitation shapes a premotor  
914 neural sequence. *J Neurosci* 35, 1217-1227.

915 Laje, R., and Buonomano, D.V. (2013). Robust timing and motor patterns by taming chaos in recurrent  
916 neural networks. *Nat Neurosci* 16, 925-933.

917 Liewald, D., Miller, R., Logothetis, N., Wagner, H.J., and Schuz, A. (2014). Distribution of axon diameters  
918 in cortical white matter: an electron-microscopic study on three human brains and a macaque. *Biol*  
919 *Cybern* 108, 541-557.

920 Lombardino, A.J., and Nottebohm, F. (2000). Age at deafening affects the stability of learned song in  
921 adult male zebra finches. *J Neurosci* 20, 5054-5064.

922 Long, M.A., and Fee, M.S. (2008). Using temperature to analyse temporal dynamics in the songbird  
923 motor pathway. *Nature* 456, 189-194.

924 Long, M.A., Jin, D.Z., and Fee, M.S. (2010). Support for a synaptic chain model of neuronal sequence  
925 generation. *Nature* 468, 394-399.

926 Lorteije, J.A., Rusu, S.I., Kushmerick, C., and Borst, J.G. (2009). Reliability and precision of the mouse  
927 calyx of Held synapse. *J Neurosci* 29, 13770-13784.

- 928 Luczak, A., McNaughton, B.L., and Harris, K.D. (2015). Packet-based communication in the cortex. *Nat*  
929 *Rev Neurosci* *16*, 745-755.
- 930 Lynch, G.F., Okubo, T.S., Hanuschkin, A., Hahnloser, R.H., and Fee, M.S. (2016). Rhythmic Continuous-  
931 Time Coding in the Songbird Analog of Vocal Motor Cortex. *Neuron* *90*, 877-892.
- 932 Magee, J.C., and Cook, E.P. (2000). Somatic EPSP amplitude is independent of synapse location in  
933 hippocampal pyramidal neurons. *Nat Neurosci* *3*, 895-903.
- 934 Markowitz, J.E., Liberti, W.A., 3rd, Guitcount, G., Velho, T., Lois, C., and Gardner, T.J. (2015).  
935 Mesoscopic patterns of neural activity support songbird cortical sequences. *PLoS Biol* *13*, e1002158.
- 936 Mauk, M.D., and Buonomano, D.V. (2004). The neural basis of temporal processing. *Annu Rev Neurosci*  
937 *27*, 307-340.
- 938 Mello, G.B., Soares, S., and Paton, J.J. (2015). A scalable population code for time in the striatum. *Curr*  
939 *Biol* *25*, 1113-1122.
- 940 Miller, R. (1996). Axonal Conduction Time and Human Cerebral Laterality. A Psychobiological Theory.  
941 (Amsterdam, The Netherlands: Harwood Academic Publisher).
- 942 Miri, A., Daie, K., Arrenberg, A.B., Baier, H., Aksay, E., and Tank, D.W. (2011). Spatial gradients and  
943 multidimensional dynamics in a neural integrator circuit. *Nat Neurosci* *14*, 1150-1159.
- 944 Mooney, R., and Prather, J.F. (2005). The HVC microcircuit: the synaptic basis for interactions between  
945 song motor and vocal plasticity pathways. *J Neurosci* *25*, 1952-1964.
- 946 Narayanan, R.T., Egger, R., Johnson, A.S., Mansvelder, H.D., Sakmann, B., de Kock, C.P., and Oberlaender,  
947 M. (2015). Beyond Columnar Organization: Cell Type- and Target Layer-Specific Principles of Horizontal  
948 Axon Projection Patterns in Rat Vibrissa Cortex. *Cereb Cortex* *25*, 4450-4468.
- 949 Nottebohm, F., Stokes, T.M., and Leonard, C.M. (1976). Central control of song in the canary, *Serinus*  
950 *canarius*. *J Comp Neurol* *165*, 457-486.
- 951 Okubo, T.S., Mackevicius, E.L., Payne, H.L., Lynch, G.F., and Fee, M.S. (2015). Growth and splitting of  
952 neural sequences in songbird vocal development. *Nature* *528*, 352-357.
- 953 Pastalkova, E., Itskov, V., Amarasingham, A., and Buzsaki, G. (2008). Internally generated cell assembly  
954 sequences in the rat hippocampus. *Science* *321*, 1322-1327.
- 955 Peh, W.Y., Roberts, T.F., and Mooney, R. (2015). Imaging auditory representations of song and syllables  
956 in populations of sensorimotor neurons essential to vocal communication. *J Neurosci* *35*, 5589-5605.
- 957 Pehlevan, C., Ali, F., and Olveczky, B.P. (2018). Flexibility in motor timing constrains the topology and  
958 dynamics of pattern generator circuits. *Nat Commun* *9*, 977.
- 959 Peters, A.J., Chen, S.X., and Komiyama, T. (2014). Emergence of reproducible spatiotemporal activity  
960 during motor learning. *Nature* *510*, 263-267.
- 961 Picardo, M.A., Merel, J., Katlowitz, K.A., Vallentin, D., Okobi, D.E., Benezra, S.E., Clary, R.C.,  
962 Pnevmatikakis, E.A., Paninski, L., and Long, M.A. (2016). Population-Level Representation of a Temporal  
963 Sequence Underlying Song Production in the Zebra Finch. *Neuron* *90*, 866-876.
- 964 Plaza, S.M., Scheffer, L.K., and Chklovskii, D.B. (2014). Toward large-scale connectome reconstructions.  
965 *Curr Opin Neurobiol* *25*, 201-210.
- 966 Pnevmatikakis, E.A., Soudry, D., Gao, Y., Machado, T.A., Merel, J., Pfau, D., Reardon, T., Mu, Y., Lacefield,  
967 C., Yang, W., *et al.* (2016). Simultaneous Denoising, Deconvolution, and Demixing of Calcium Imaging  
968 Data. *Neuron* *89*, 285-299.
- 969 Prut, Y., Vaadia, E., Bergman, H., Haalman, I., Slovlin, H., and Abeles, M. (1998). Spatiotemporal structure  
970 of cortical activity: properties and behavioral relevance. *J Neurophysiol* *79*, 2857-2874.
- 971 Rajan, K., Harvey, C.D., and Tank, D.W. (2016). Recurrent Network Models of Sequence Generation and  
972 Memory. *Neuron* *90*, 128-142.
- 973 Rushton, W.A. (1951). A theory of the effects of fibre size in medullated nerve. *J Physiol* *115*, 101-122.
- 974 Sabatini, B.L., and Regehr, W.G. (1996). Timing of neurotransmission at fast synapses in the mammalian  
975 brain. *Nature* *384*, 170-172.

- 976 Sachidhanandam, S., Sreenivasan, V., Kyriakatos, A., Kremer, Y., and Petersen, C.C. (2013). Membrane  
977 potential correlates of sensory perception in mouse barrel cortex. *Nat Neurosci* *16*, 1671-1677.
- 978 Salami, M., Itami, C., Tsumoto, T., and Kimura, F. (2003). Change of conduction velocity by regional  
979 myelination yields constant latency irrespective of distance between thalamus and cortex. *Proc Natl*  
980 *Acad Sci U S A* *100*, 6174-6179.
- 981 Schmitt, L.I., Wimmer, R.D., Nakajima, M., Happ, M., Mofakham, S., and Halassa, M.M. (2017). Thalamic  
982 amplification of cortical connectivity sustains attentional control. *Nature* *545*, 219-223.
- 983 Seung, H.S. (2012). *Connectome: How the Brain's Wiring Makes Us Who We Are* (New York, NY:  
984 Houghton Mifflin Harcourt Publishing).
- 985 Shu, Y., Duque, A., Yu, Y., Haider, B., and McCormick, D.A. (2007). Properties of action-potential  
986 initiation in neocortical pyramidal cells: evidence from whole cell axon recordings. *J Neurophysiol* *97*,  
987 746-760.
- 988 Shu, Y., Hasenstaub, A., Duque, A., Yu, Y., and McCormick, D.A. (2006). Modulation of intracortical  
989 synaptic potentials by presynaptic somatic membrane potential. *Nature* *441*, 761-765.
- 990 Sugihara, I., Lang, E.J., and Llinas, R. (1993). Uniform olivocerebellar conduction time underlies Purkinje  
991 cell complex spike synchronicity in the rat cerebellum. *J Physiol* *470*, 243-271.
- 992 Swadlow, H.A. (1985). Physiological properties of individual cerebral axons studied in vivo for as long as  
993 one year. *J Neurophysiol* *54*, 1346-1362.
- 994 Swadlow, H.A. (1994). Efferent neurons and suspected interneurons in motor cortex of the awake  
995 rabbit: axonal properties, sensory receptive fields, and subthreshold synaptic inputs. *J Neurophysiol* *71*,  
996 437-453.
- 997 Swadlow, H.A., Kocsis, J.D., and Waxman, S.G. (1980). Modulation of impulse conduction along the  
998 axonal tree. *Annu Rev Biophys Bioeng* *9*, 143-179.
- 999 Swadlow, H.A., Waxman, S.G., and Weyand, T.G. (1981). Effects of variations in temperature on impulse  
1000 conduction along nonmyelinated axons in the mammalian brain. *Exp Neurol* *71*, 383-389.
- 1001 Vu, E.T., Mazurek, M.E., and Kuo, Y.C. (1994). Identification of a forebrain motor programming network  
1002 for the learned song of zebra finches. *J Neurosci* *14*, 6924-6934.
- 1003 Williams, S.R., and Stuart, G.J. (2002). Dependence of EPSP efficacy on synapse location in neocortical  
1004 pyramidal neurons. *Science* *295*, 1907-1910.
- 1005 Yildiz, I.B., and Kiebel, S.J. (2011). A hierarchical neuronal model for generation and online recognition of  
1006 birdsongs. *PLoS Comput Biol* *7*, e1002303.

1007

1008

# Figure 1 (1 column)

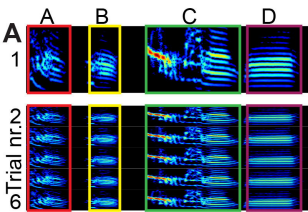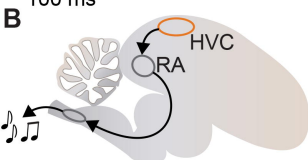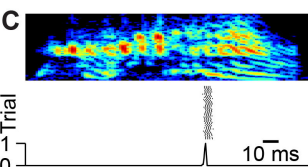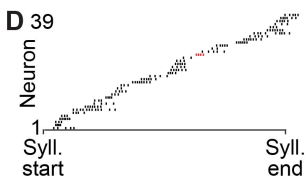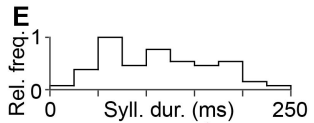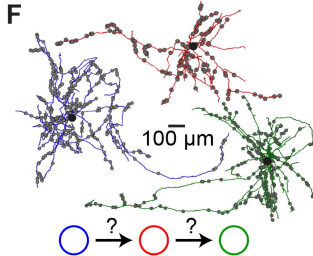

# Figure 2 (1 column)

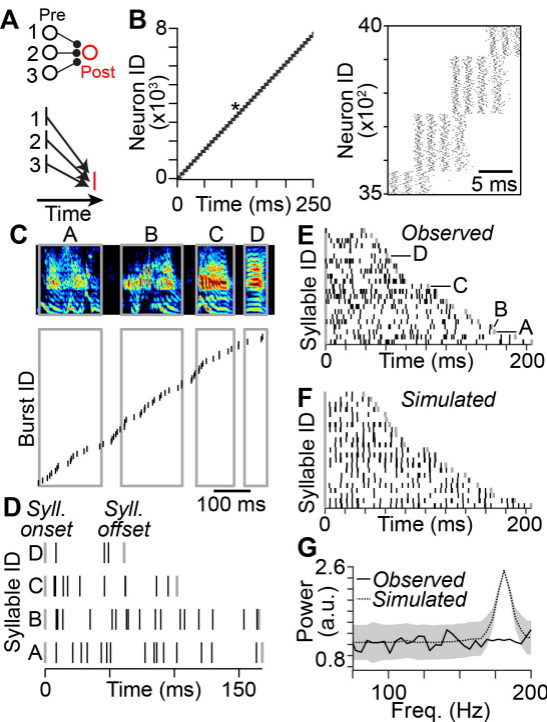

# Figure 3 (1 column)

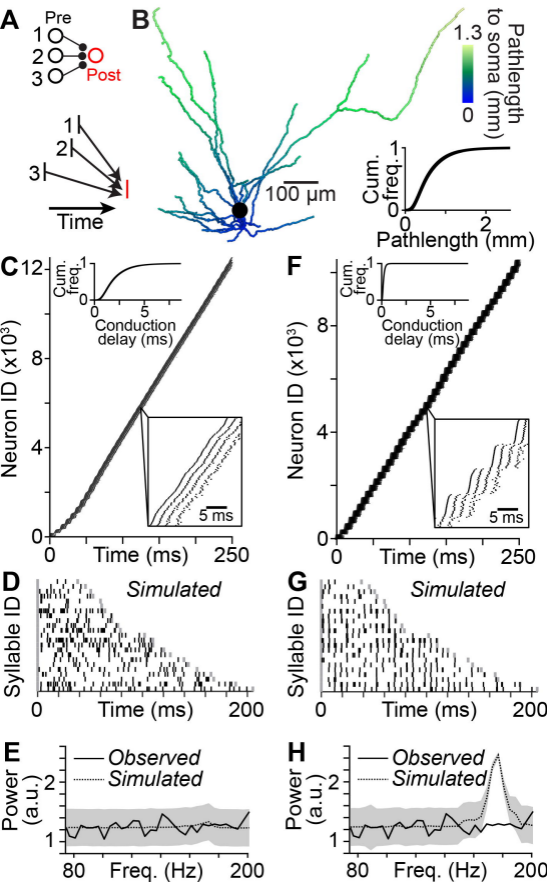

# Figure 4 (2 columns)

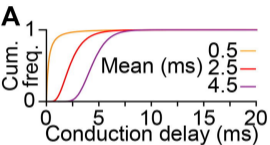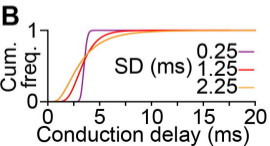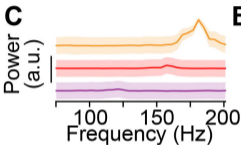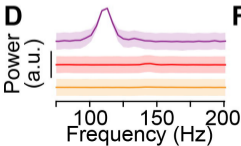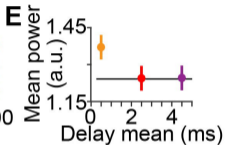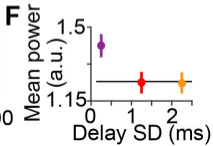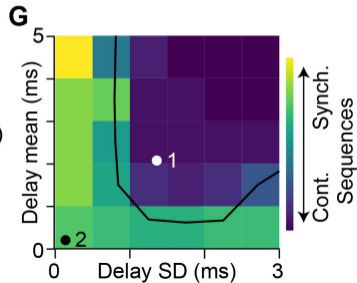



# Figure 5 (1.5 columns)

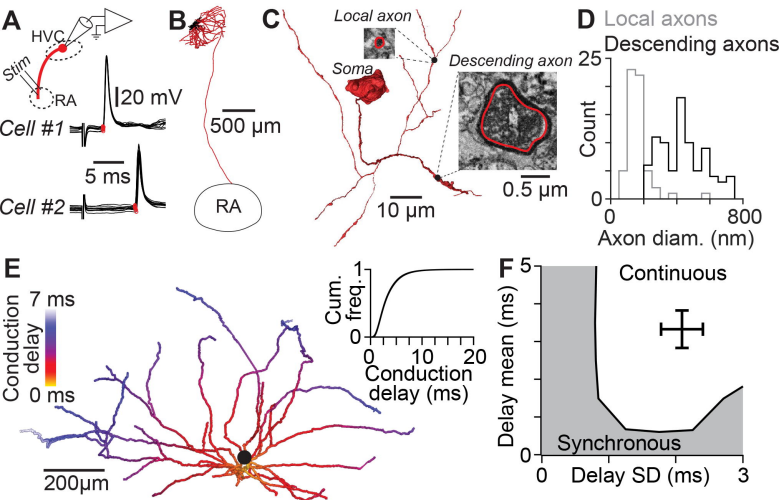

# Figure 6 (2 columns)

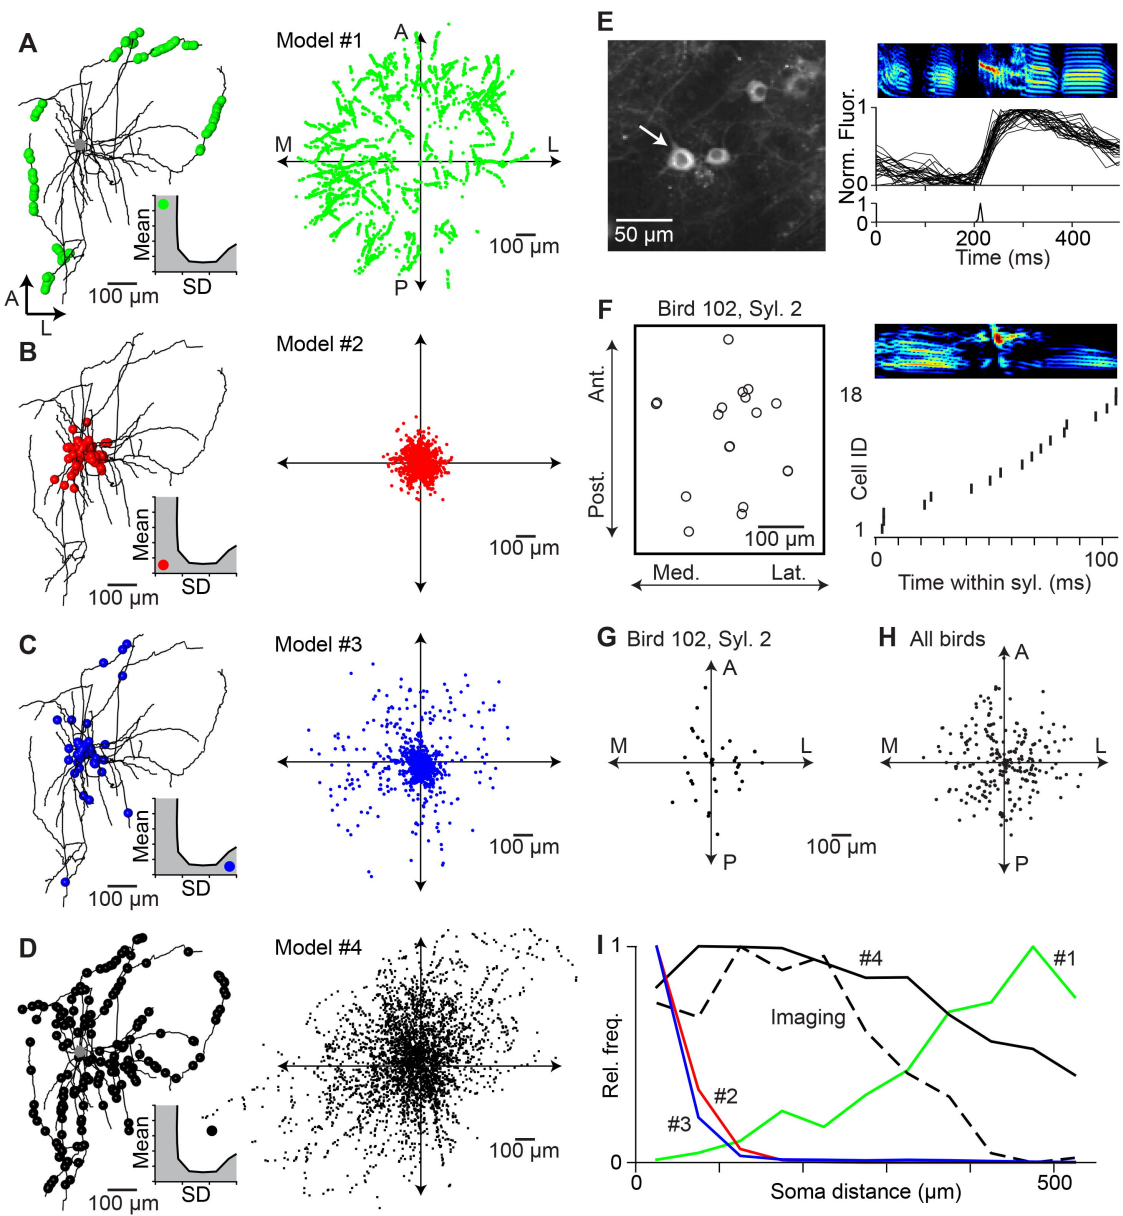

# Figure 7 (1.5 columns)

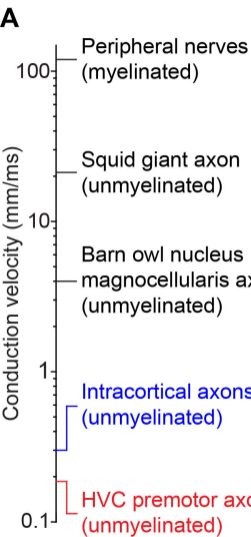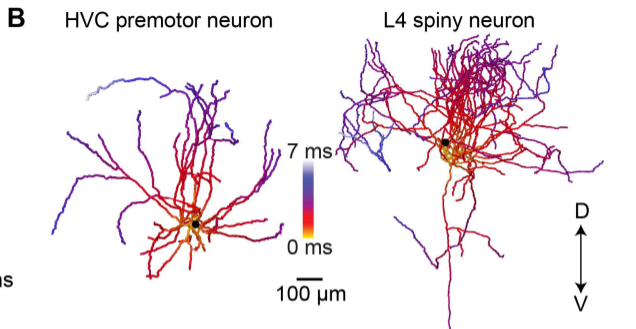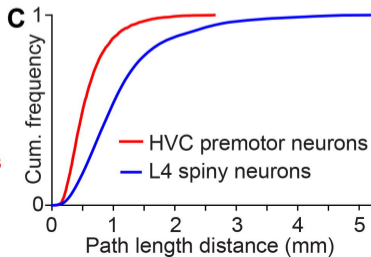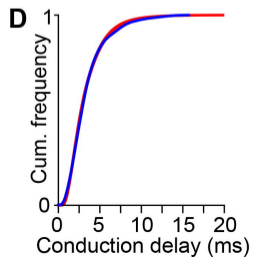

Source: https://www.biorxiv.org/content/10.1101/864231v1.full.pdf
